# Supplementary material for: Phosphorus pentoxide/metal chloride mediated efficient and facile catalytic conversion of fructose into 5-hydroxymethylfurfural
Source: Royal Society of Chemistry journal article supplement (doi:10.1039/c8ra07027j), 2018-01-01
Supplement: c8ra07027j1.pdf [file c8ra07027j1.pdf]

## Experimental Section

**Materials:** D-fructose (99%), inulin (from dahlia tubers), 5-hydroxymethylfurfural (5-HMF, 99%),  $\text{MnCl}_2 \cdot 4\text{H}_2\text{O}$  (99%),  $\text{NiCl}_2 \cdot 6\text{H}_2\text{O}$  (99%),  $\text{LaCl}_3 \cdot 7\text{H}_2\text{O}$  (99%),  $\text{CoCl}_2 \cdot 6\text{H}_2\text{O}$  (99%),  $\text{ZnCl}_2$  (99%),  $\text{AlCl}_3 \cdot 6\text{H}_2\text{O}$  (98%) and  $\text{InCl}_3 \cdot 4\text{H}_2\text{O}$  (99%) were purchased from Aladdin (China).  $\text{CrCl}_3 \cdot 6\text{H}_2\text{O}$  (98%) was purchased from Sigma-Aldrich (China).  $\text{YCl}_3 \cdot 6\text{H}_2\text{O}$  (99%) was purchased from Energy Chemical (China).  $\text{SnCl}_4 \cdot 5\text{H}_2\text{O}$  (99%),  $\text{P}_2\text{O}_5$  (98%),  $\text{Ni}(\text{NO}_3)_2 \cdot 6\text{H}_2\text{O}$  (98%),  $\text{NiSO}_4 \cdot 6\text{H}_2\text{O}$  (98%),  $\text{Cr}(\text{NO}_3)_3 \cdot 9\text{H}_2\text{O}$  (99%),  $\text{Cr}_2(\text{SO}_4)_3 \cdot 6\text{H}_2\text{O}$  (99%),  $\text{NaCl}$  (99%),  $\text{H}_3\text{PO}_4$  (85 wt%),  $\text{Na}_3\text{PO}_4$  (98%),  $\text{Na}_2\text{HPO}_4$  (99%),  $\text{NaH}_2\text{PO}_4 \cdot 2\text{H}_2\text{O}$  (99%), dimethyl sulfoxide (DMSO, 99%) and glycerol (99%) were purchased from Sinopharm (China). Sulfuric acid ( $\text{H}_2\text{SO}_4$ , 98 wt%) was provided by a local supplier. All of the commercial chemicals were used as received. Purified water ( $\text{H}_2\text{O}$ ) with a resistivity of 18.2  $\text{M}\Omega\text{-cm}$  was produced by an ultra-pure water system (Taoshi Brand, China).

**Reaction procedure:** Typically, fructose (60 mg), catalyst (10 mol% to fructose) and DMSO (1 mL) were added into a reaction vial with a magnetic stir bar. The vial was sealed and inserted into a heating block. The reaction mixture was stirred at the reaction temperature. After a specified time, the reaction was quenched by immersing the reaction vial in an ice-water bath. The mixture was diluted by water and a certain amount of glycerol (internal standard) was added. A small amount of reaction mixture was taken out, further diluted with water and filtered for analysis.

**Analysis method:** The samples were analyzed by high performance liquid chromatography (HPLC). HPLC was performed on a Shimadzu LC-16 system equipped with a Shimadzu RID-20 refractive index detector and an Agilent Hi-Plex ligand exchange column (H-form, 300×7.7 mm). A 0.005 M aqueous solution of  $\text{H}_2\text{SO}_4$  was used as the mobile phase. The flow rate was set to be 0.65 mL/min. The column and detector temperatures were 65 °C and 50 °C, respectively. Glycerol was added as the internal standard for quantitative calculations. Fructose conversion, 5-HMF yield and selectivity were calculated by mole.

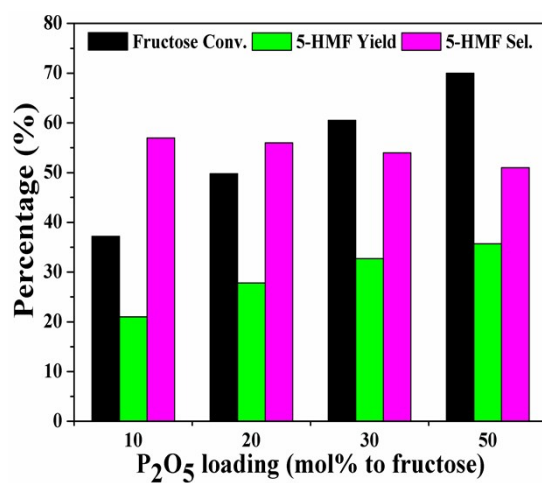

**Fig. S1** The conversion of fructose into 5-HMF with different amounts of P<sub>2</sub>O<sub>5</sub> (reaction conditions: fructose 60 mg; DMSO 1mL; 80 °C; 30 min).

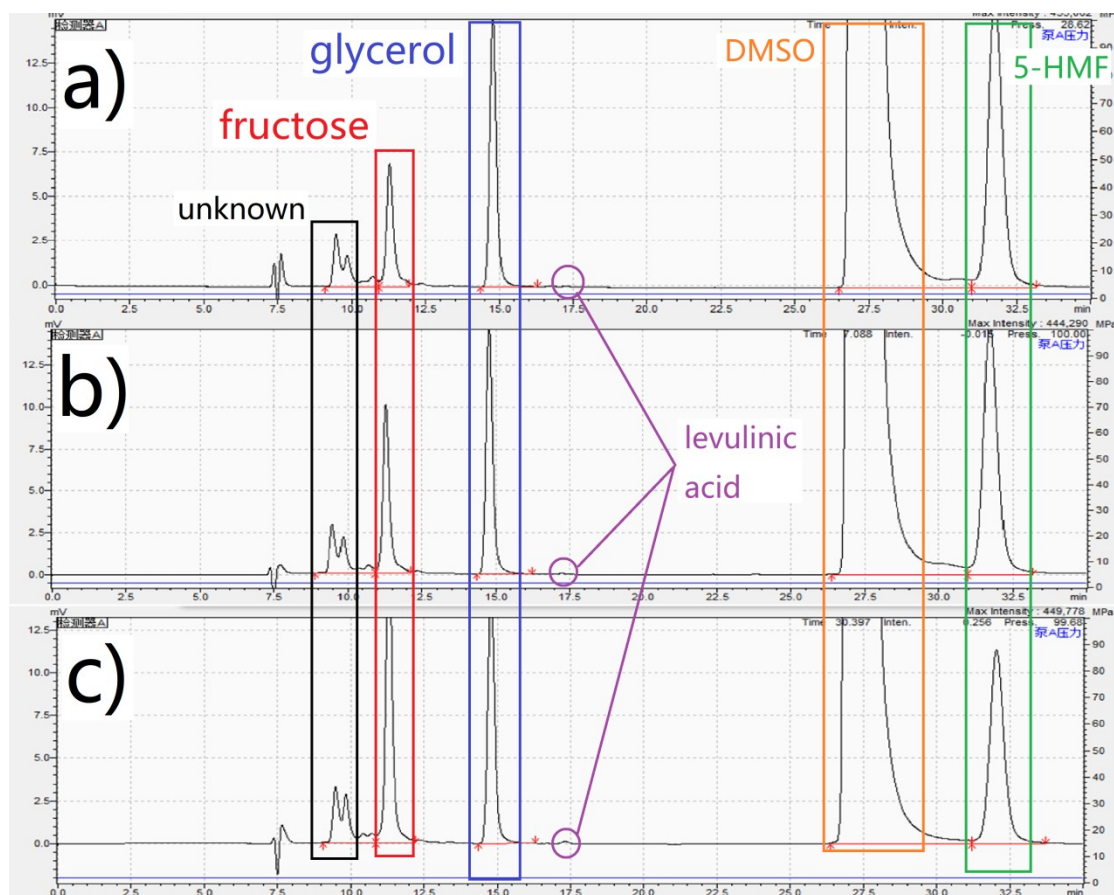

**Fig. S2** The HPLC chromatograms for the reactions with a) P<sub>2</sub>O<sub>5</sub> and NiCl<sub>2</sub>•6H<sub>2</sub>O, b) P<sub>2</sub>O<sub>5</sub> and CrCl<sub>3</sub>•6H<sub>2</sub>O, c) P<sub>2</sub>O<sub>5</sub> and NaCl (reaction conditions: fructose 60 mg; P<sub>2</sub>O<sub>5</sub> 10 mol% to fructose; metal chloride 10 mol% to fructose; DMSO 1mL; 80 °C; 30 min).

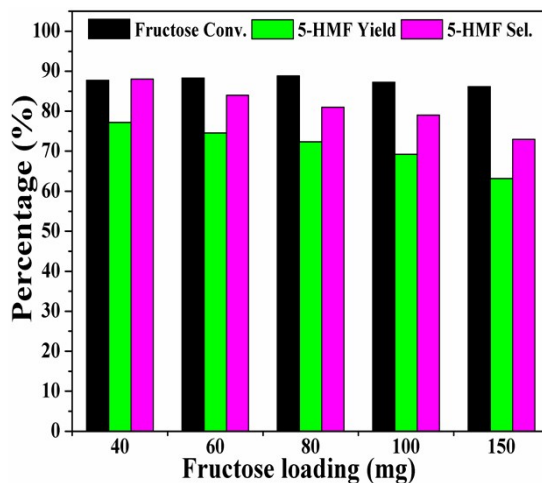

**Fig. S3** Effect of different substrate loadings on the conversion of fructose (reaction conditions:  $P_2O_5$  10 mol% to fructose;  $NiCl_2 \cdot 6H_2O$  10 mol% to fructose; DMSO 1mL; 80 °C; 30 min).

**Table S1** Results on the conversion of fructose over  $P_2O_5$  and different chromium salts.<sup>[a]</sup>

| Entry | Catalyst                            | Fructose Conv. (%) | 5-HMF Yield (%) | 5-HMF Sel. (%) |
|-------|-------------------------------------|--------------------|-----------------|----------------|
| 1     | $P_2O_5$                            | 37                 | 21              | 57             |
| 2     | $P_2O_5 + CrCl_3 \cdot 6H_2O$       | 81                 | 67              | 83             |
| 3     | $P_2O_5 + Cr(NO_3)_3 \cdot 9H_2O$   | 75                 | 49              | 65             |
| 4     | $P_2O_5 + Cr_2(SO_4)_3 \cdot 6H_2O$ | 40                 | 26              | 65             |

<sup>[a]</sup> Reaction conditions: fructose 60 mg;  $P_2O_5$  10 mol% to fructose; Cr fraction 10 mol% to fructose; DMSO 1mL; 80 °C; 30 min.

**Table S2** Results on the conversion of inulin into 5-HMF in the studied system.<sup>[a]</sup>

| Entry | Temperature (°C) | Time (min) | 5-HMF Yield (%) |
|-------|------------------|------------|-----------------|
| 1     | 80               | 8          | 22              |
| 2     | 80               | 15         | 36              |
| 3     | 80               | 30         | 42              |
| 4     | 80               | 60         | 45              |
| 5     | 90               | 8          | 35              |
| 6     | 90               | 15         | 43              |
| 7     | 90               | 30         | 45              |
| 8     | 100              | 8          | 39              |
| 9     | 100              | 15         | 44              |

<sup>[a]</sup> Reaction conditions: inulin 60 mg;  $P_2O_5$  10 mol% to fructose unit in inulin;  $NiCl_2 \cdot 6H_2O$  10 mol% to fructose unit in inulin; DMSO 1mL.

**Table S3** Results on the conversion of glucose in the studied system.<sup>[a]</sup>

| Entry | Catalyst                                                            | Time (min) | Glucose Conv. (%) | 5-HMF Yield (%) |
|-------|---------------------------------------------------------------------|------------|-------------------|-----------------|
| 1     | P <sub>2</sub> O <sub>5</sub>                                       | 30         | 10                |                 |
| 2     | NiCl <sub>2</sub> ·6H <sub>2</sub> O                                | 30         | 6                 |                 |
| 3     | CrCl <sub>3</sub> ·6H <sub>2</sub> O                                | 30         | 11                |                 |
| 4     | P <sub>2</sub> O <sub>5</sub> +NiCl <sub>2</sub> ·6H <sub>2</sub> O | 30         | 11                |                 |
| 5     | P <sub>2</sub> O <sub>5</sub> +CrCl <sub>3</sub> ·6H <sub>2</sub> O | 30         | 23                |                 |
| 6     | P <sub>2</sub> O <sub>5</sub> +NiCl <sub>2</sub> ·6H <sub>2</sub> O | 60         | 23                |                 |
| 7     | P <sub>2</sub> O <sub>5</sub> +CrCl <sub>3</sub> ·6H <sub>2</sub> O | 60         | 31                | 0.2             |
| 8     | P <sub>2</sub> O <sub>5</sub> +AlCl <sub>3</sub> ·6H <sub>2</sub> O | 60         | 44                | 0.2             |

<sup>[a]</sup> Reaction conditions: glucose 60 mg; P<sub>2</sub>O<sub>5</sub> 10 mol% to glucose; metal chloride 10 mol% to glucose; DMSO 1mL; 100 °C.
